# Supplementary material for: Impact of interventions to reduce sugar-sweetened beverage intake in children and adults: a protocol for a systematic review and meta-analysis
Source: PubMed Central journal article supplement (PMC4343267; doi:10.1186/s13643-015-0008-4), 2015-02-21
Supplement: 13643_2015_8_MOESM1_ESM.pdf [file 13643_2015_8_MOESM1_ESM.pdf]

**Additional file 1.** Example searching strategy: Medline (Ovid)

| <b>Searching strategy: Medline</b> |                                                                                                                                                                                                                                                                    |
|------------------------------------|--------------------------------------------------------------------------------------------------------------------------------------------------------------------------------------------------------------------------------------------------------------------|
| 1                                  | ((sugar\$ adj2 beverage\$) or (sugar\$ adj2 drink\$) or (carbonated adj beverage\$) or (carbonated adj drink\$) or (fizzy adj drink\$) or (fizzy adj beverage\$) or (liquid\$ adj carbohydrate\$) or cordial\$ or (cola adj beverage\$) or (cola adj drink\$)).tw. |
| 2                                  | ("sugar sweetened beverage\$" or "sugar-sweetened beverage\$").tw.                                                                                                                                                                                                 |
| 3                                  | exp Carbonated Beverages/                                                                                                                                                                                                                                          |
| 4                                  | (sugar containing adj (beverage\$ or drink\$)).tw.                                                                                                                                                                                                                 |
| 5                                  | (non alcohol\$ adj2 (beverage\$ or drink\$)).tw.                                                                                                                                                                                                                   |
| 6                                  | ("high energy beverage\$" or "high energy drink\$").tw.                                                                                                                                                                                                            |
| 7                                  | (energy adj2 (drink\$ or beverage\$)).tw.                                                                                                                                                                                                                          |
| 8                                  | ("sweet\$ caloric beverage\$" or "sweet\$ caloric drink\$").tw.                                                                                                                                                                                                    |
| 9                                  | (sweet\$ adj2 (beverage\$ or drink\$)).tw.                                                                                                                                                                                                                         |
| 10                                 | ((added adj2 sugar\$) and (beverage\$ or drink\$)).tw.                                                                                                                                                                                                             |
| 11                                 | (sugar\$ rich adj2 (drink\$ or beverage\$)).tw.                                                                                                                                                                                                                    |
| 12                                 | (fruit adj2 juice\$).tw.                                                                                                                                                                                                                                           |
| 13                                 | 1 or 2 or 3 or 4 or 5 or 6 or 7 or 8 or 9 or 10 or 11 or 12                                                                                                                                                                                                        |
| 14                                 | ((non calori* sweet* and (beverage\$ or drink\$)) or (non nutriti* sweet* and (beverage\$ or drink\$))).tw.                                                                                                                                                        |
| 15                                 | (reduced calori* adj2 (beverage\$ or drink\$ or juice\$)).tw.                                                                                                                                                                                                      |
| 16                                 | ((sucralose adj2 (beverage\$ or drink\$ or juice\$)) or (neotame adj2 (beverage\$ or drink\$ or juice\$)) or (acesulfame adj3 (beverage\$ or drink\$ or juice\$)) or (saccharin adj2 (beverage\$ or drink\$ or juice\$))).tw.                                      |
| 17                                 | ((diet* adj2 (beverage\$ or drink\$ or juice\$)) or (low calori* adj (beverage\$ or drink\$ or juice\$))).tw.                                                                                                                                                      |

|    |                                                                                                             |
|----|-------------------------------------------------------------------------------------------------------------|
| 18 | (artificial\$ sweet\$ adj2 (beverage\$ or drink\$ or juice\$)).tw.                                          |
| 19 | (artificial* sweet\$ and (beverage\$ or drink\$ or juice\$)).tw.                                            |
| 20 | ((intense sweetener\$ and (beverage\$ or drink\$)) or (intense sweet\$ adj3 (beverage\$ or drink\$))).tw.   |
| 21 | ((sweetening agent and (beverage\$ or drink\$)) or (artificial\$ sweet\$ adj2 (beverage\$ or drink\$))).tw. |
| 22 | (sugar-free adj2 (beverage\$ or drink\$)).tw.                                                               |
| 23 | 14 or 15 or 16 or 17 or 18 or 19 or 20 or 21 or 22                                                          |
| 24 | (sport\$ adj2 (drink\$ or beverage\$)).tw.                                                                  |
| 25 | 13 or 24                                                                                                    |
| 26 | (health\$ adj2 behavio#r).tw.                                                                               |
| 27 | exp Health Behavior/ or exp Health Education/ or exp Health Promotion/                                      |
| 28 | (health education or health promotion).tw.                                                                  |
| 29 | ((community adj2 intervention\$) or (media adj2 intervention\$)).tw.                                        |
| 30 | ((community or school) adj2 (intervention\$ or program\$)).tw.                                              |
| 31 | ((family adj2 intervention\$) or (parent\$ adj2 intervention\$)).tw.                                        |
| 32 | ((lifestyle or life style) adj2 (chang\$ or intervention\$)).tw.                                            |
| 33 | (behavio#r adj (chang\$ or intervention\$ or strateg\$)).tw.                                                |
| 34 | (health\$ adj2 (attitude\$ or school\$)).tw.                                                                |
| 35 | exp Health Knowledge, Attitudes, Practice/                                                                  |
| 36 | (diet\$ adj (chang\$ or education or behavio#r or pattern\$)).tw.                                           |
| 37 | exp health policy/ or exp nutrition policy/                                                                 |
| 38 | ((nutrition\$ adj3 polic\$) or (food adj polic\$) or (school\$ adj polic\$)).tw.                            |
| 39 | 26 or 27 or 28 or 29 or 30 or 31 or 32 or 33 or 34 or 35 or 36 or 37 or 38                                  |
| 40 | randomi#ed controlled trial.pt.                                                                             |

|    |                                                                                          |
|----|------------------------------------------------------------------------------------------|
| 41 | controlled clinical trial.pt.                                                            |
| 42 | randomi#ed.ab.                                                                           |
| 43 | randomly.ab.                                                                             |
| 44 | trial.ab.                                                                                |
| 45 | groups.ab.                                                                               |
| 46 | exp intervention studies/ or exp pilot projects/ or exp comparative study/               |
| 47 | 40 or 41 or 42 or 43 or 44 or 45 or 46                                                   |
| 48 | limit 47 to yr=1990-2014                                                                 |
| 49 | exp Drinking Water/                                                                      |
| 50 | (water adj3 provision).tw.                                                               |
| 51 | (filter\$ adj water).tw.                                                                 |
| 52 | (water adj2 (increas\$ or intake\$ or consum\$)).tw.                                     |
| 53 | (drinking water adj (increas\$ or intake\$ or consum\$ or decreas\$ or reduction\$)).tw. |
| 54 | (plain adj2 water).tw.                                                                   |
| 55 | 49 or 50 or 51 or 52 or 53 or 54                                                         |
| 56 | exp animals/ not (exp animals/ and exp humans/)                                          |
| 57 | exp Veterinary Medicine/                                                                 |
| 58 | exp Animal Experimentation/                                                              |
| 59 | 56 or 57 or 58                                                                           |
| 60 | (25 and 39 and 48) not 59                                                                |
| 61 | (23 and 39 and 48) not 59                                                                |
| 62 | (55 and 39 and 48) not 59                                                                |
